# Supplementary material for: An Interactive Text Message Survey as a Novel Assessment for Bedtime Routines in Public Health Research: Observational Study
Source: PubMed Central journal article supplement (PMC7781795; doi:10.2196/15524), 2020-12-21

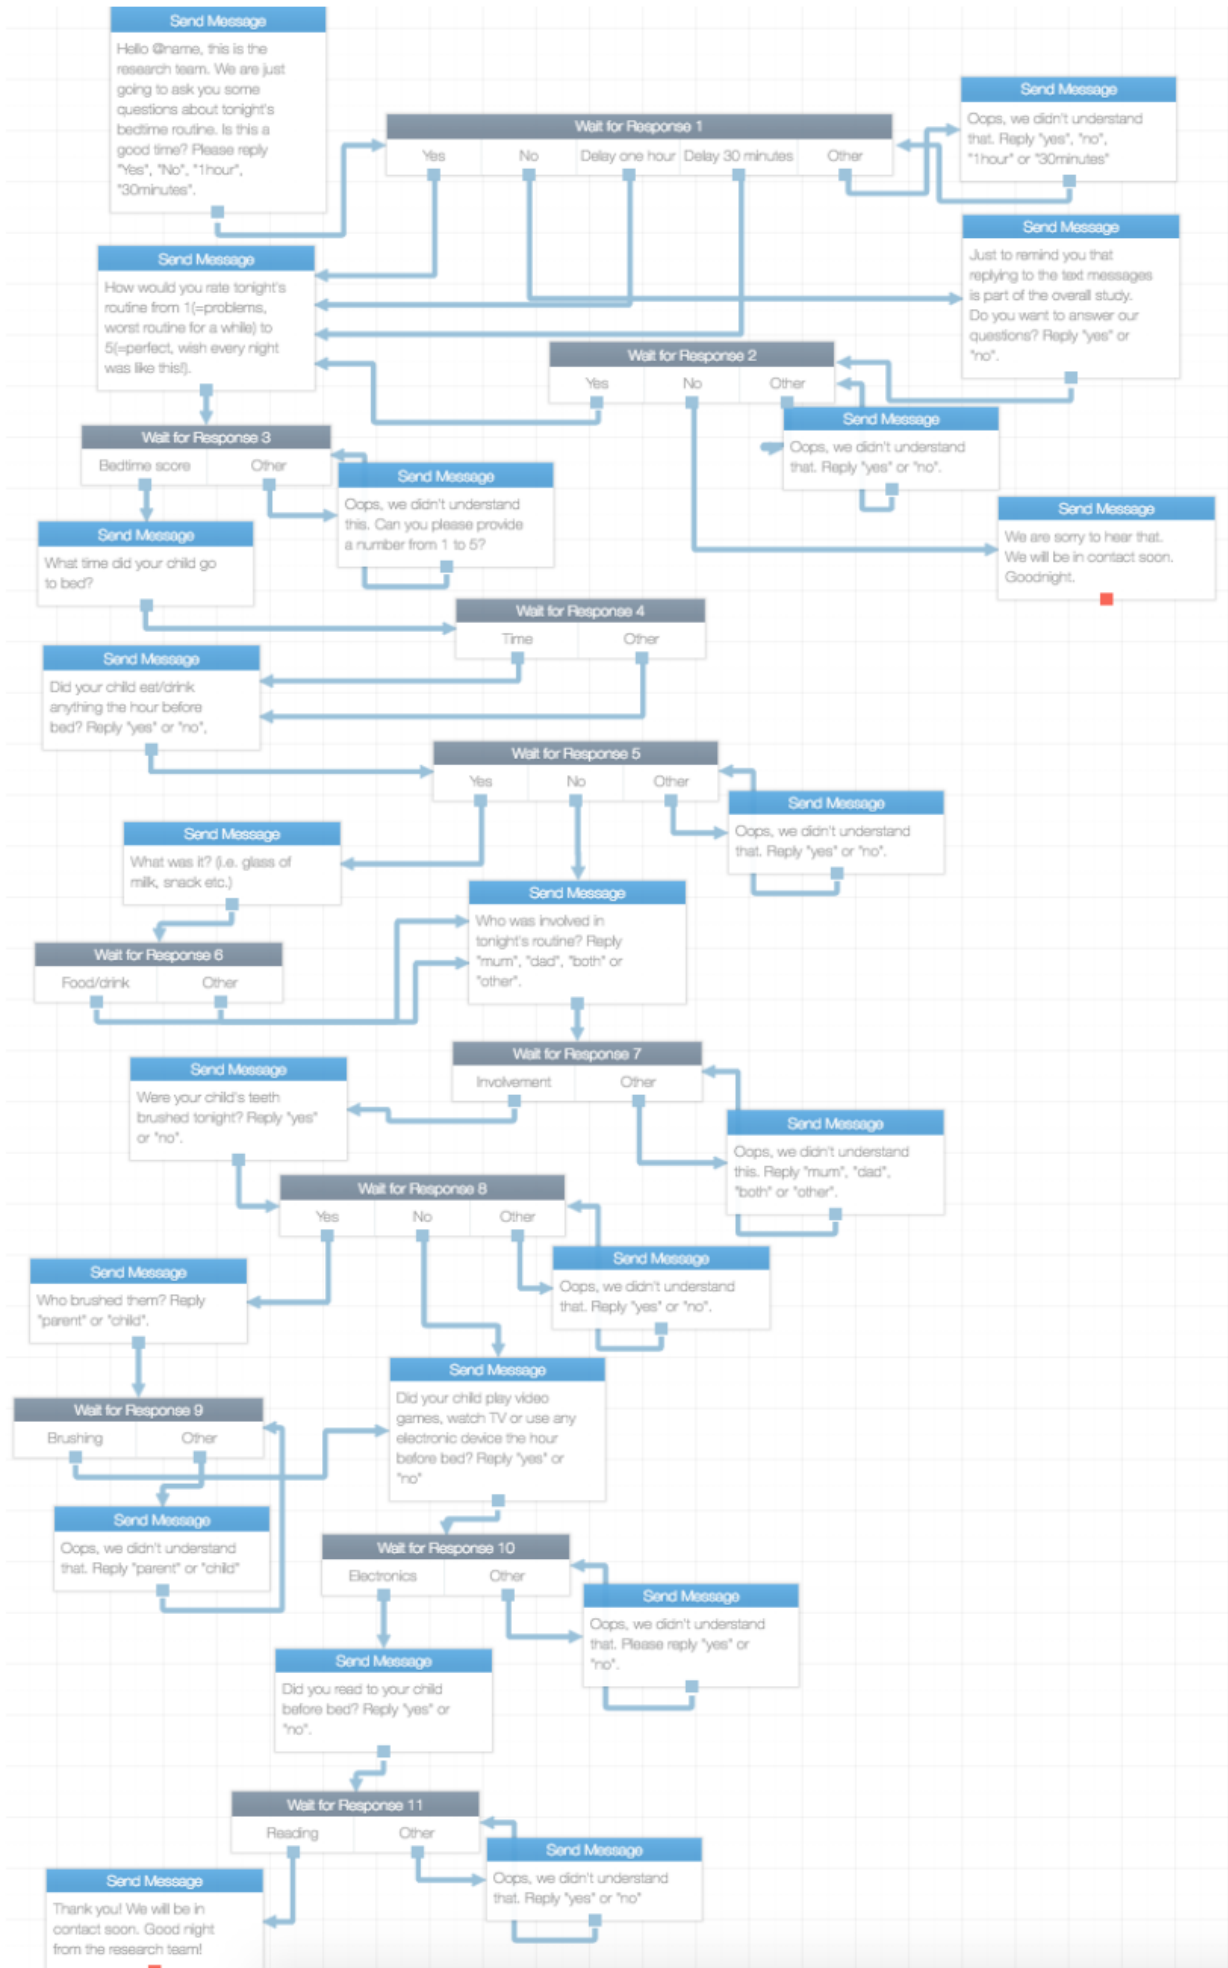

Supplement: publichealth_v6i4e15524_app2.pdf [file publichealth_v6i4e15524_app2.pdf]
